# Supplementary material
Source: PubMed Central journal article supplement (PMC4388556)
Supplement: NIHMS676421-supplement-Supplementary.pdf [file NIHMS676421-supplement-Supplementary.pdf]

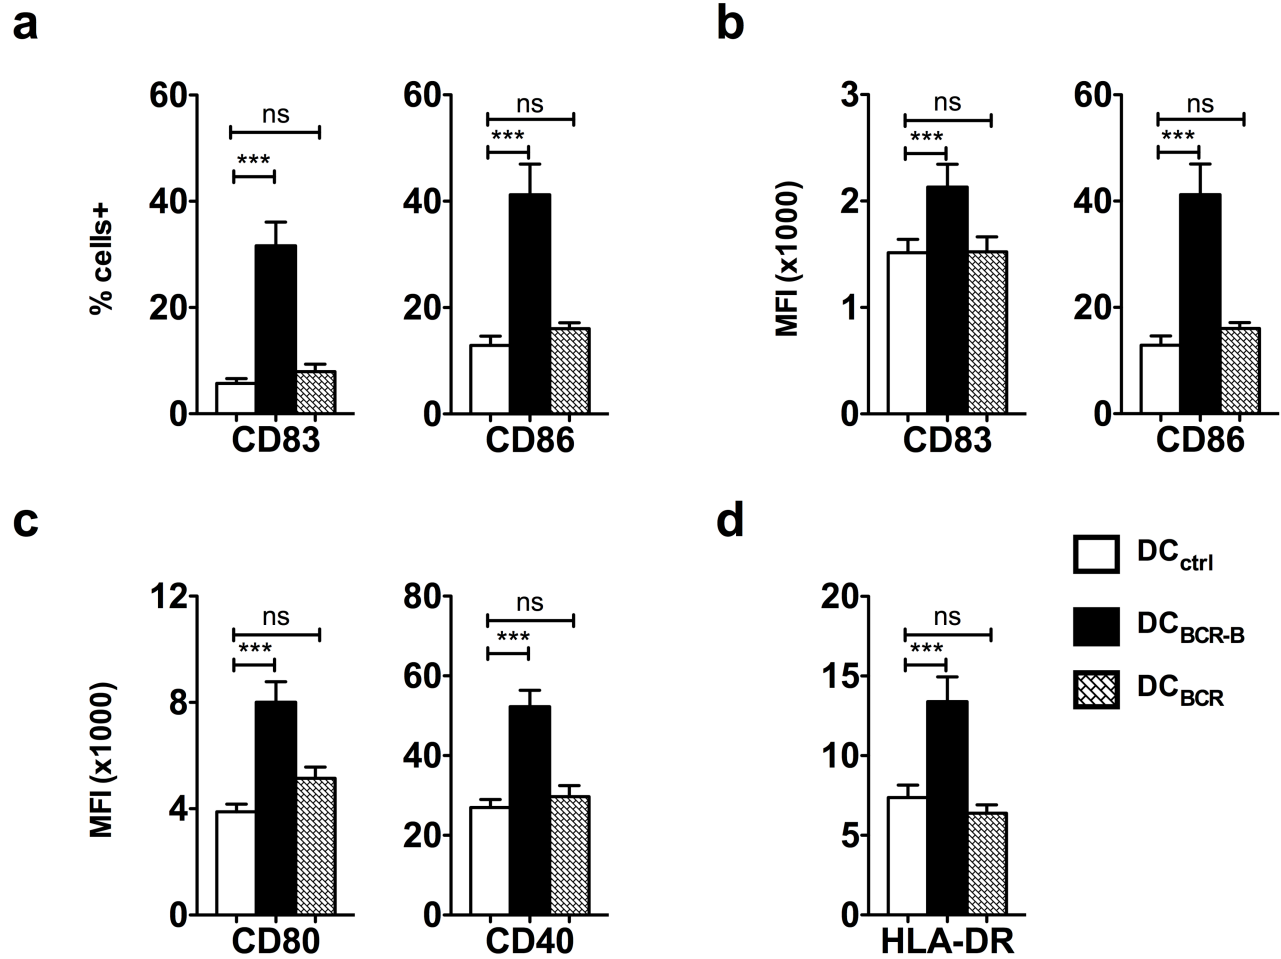

**Supplementary Figure 1. F(ab')<sub>2</sub> fragments of anti-human IgM do not modulate DC phenotype.** Immature DCs ( $0.1 \times 10^6$  cells/200  $\mu$ l/well) with GM-CSF and IL-4 were cultured either alone (DC<sub>ctrl</sub>) or F(ab')<sub>2</sub> of goat anti-human IgM (10  $\mu$ g/ml) (DC<sub>BCR</sub>) or co-cultured at 1:1 ratio with CD19<sup>+</sup> B cells that were directly activated in DC-B cell co-culture via BCR stimuli using F(ab')<sub>2</sub> of goat anti-human IgM (10  $\mu$ g/ml) (DC<sub>BCR-B</sub>) for 48 hours. **(a-d)** Phenotypic analysis (% positive cells and MFI) of CD20-negative cells was done by flow cytometry. Mean  $\pm$  s.e.m of data from 10 donors. \*\*\* $P < 0.001$ ; ns, not significant by one way analysis of variance test.

**a**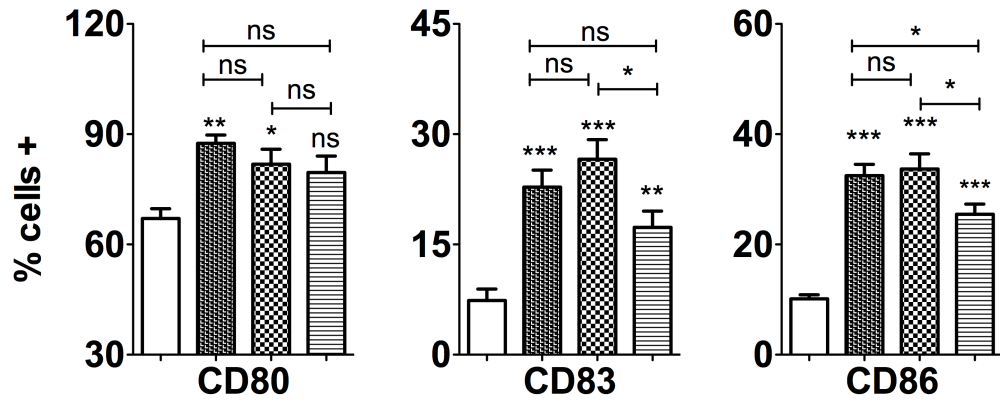**b**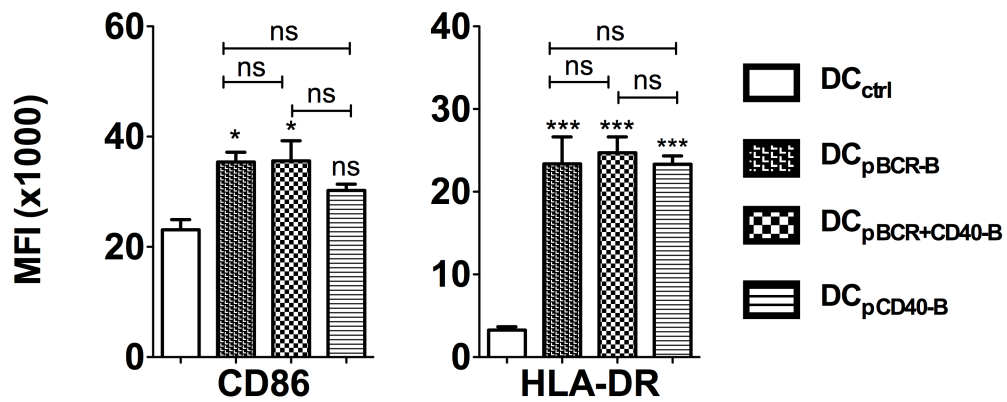

**Supplementary Figure 2. Comparison of DC activation capacity of B cells stimulated with various stimuli.** Immature DCs were cultured in medium containing GM-CSF and IL-4 for 48 hours either alone (DC<sub>ctrl</sub>) or co-cultured with CD19<sup>+</sup> B cells that were pre-activated by BCR (DC<sub>pBCR-B</sub>) or CD40 (DC<sub>pCD40-B</sub>) or BCR+CD40 (DC<sub>pBCR+CD40-B</sub>) stimulation. **(a and b)** Phenotypic analysis (% positive cells and MFI) of DCs that were gated negative for CD20. Mean  $\pm$  s.e.m of data from 5 donors. \* $P < 0.05$ ; \*\* $P < 0.01$ ; \*\*\* $P < 0.001$ ; ns, not significant by one way analysis of variance test.

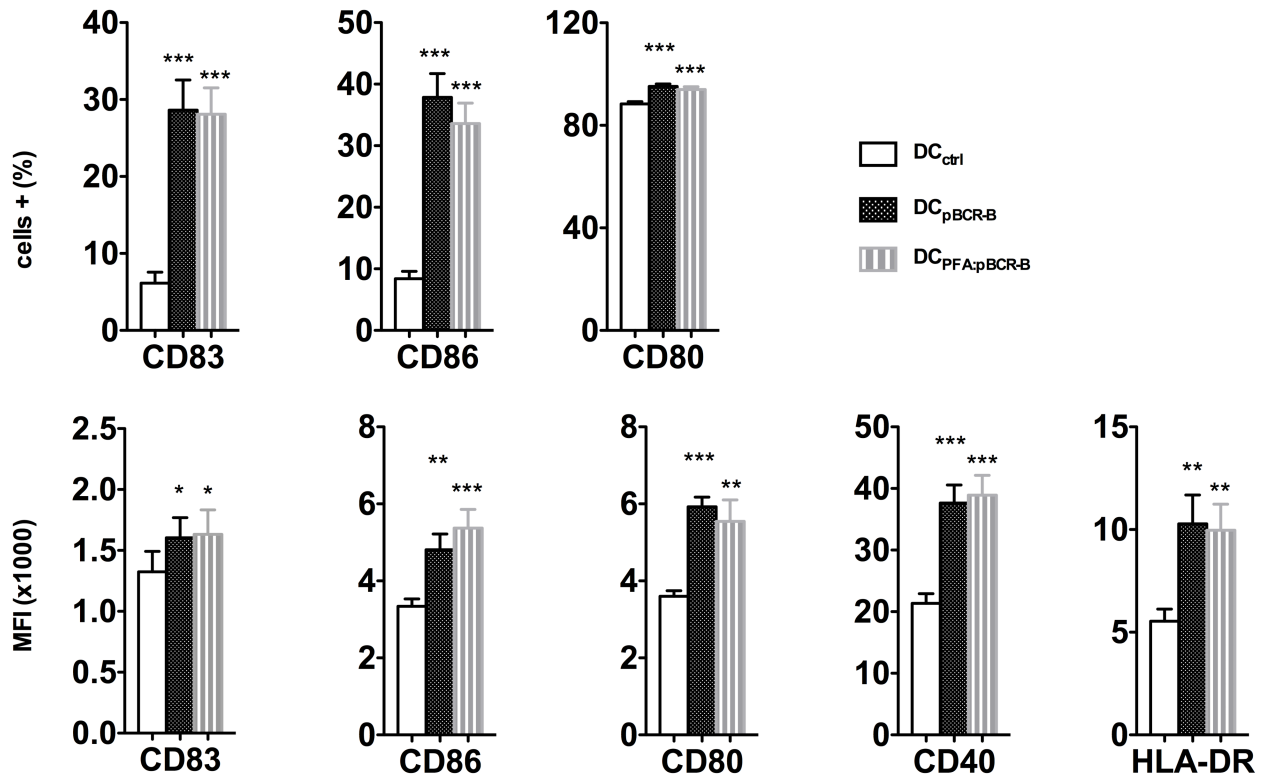

**Supplementary Figure 3. Pre-activated live and paraformaldehyde-fixed B cells are capable of triggering maturation of DCs.** Immature DCs were cultured in medium containing GM-CSF and IL-4 for 48 hours either alone (DC<sub>ctrl</sub>) or co-cultured with live CD19<sup>+</sup> B cells pre-activated by BCR (DC<sub>pBCR-B</sub>) or paraformaldehyde-fixed BCR-activated B cells (DC<sub>PFA:pBCR-B</sub>). Phenotypic analysis of DCs that were gated negative for CD20 was done by flow cytometry. Mean  $\pm$  s.e.m of data from 6 different donors. \* $P < 0.05$ ; \*\* $P < 0.01$ ; \*\*\* $P < 0.001$  by one way analysis of variance test.

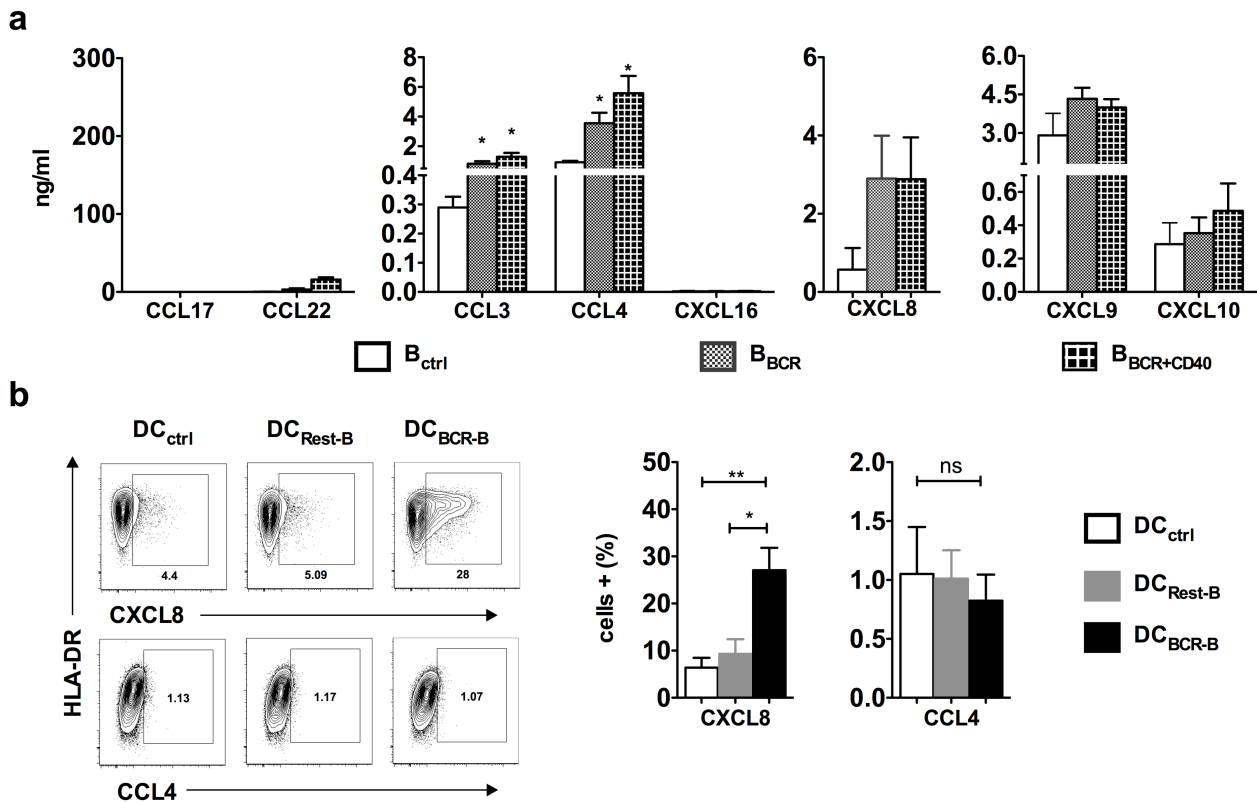

**Supplementary Figure 4. Secretion of chemokines by B cells and DCs.** (a)  $CD19^+$  B cells were either cultured alone ( $B_{ctrl}$ ) or in the presence of BCR ( $B_{BCR}$ ) or BCR+CD40 ( $B_{BCR+CD40}$ ) stimulation for 48 hours. Supernatants were analyzed for various chemokines. Mean $\pm$ SEM of data from 5 donors. \*,  $P < 0.05$  by one way-ANOVA test. (b) Immature DCs were cultured for 48 hours in the medium containing GM-CSF and IL-4 alone ( $DC_{ctrl}$ ) or co-cultured at 1:1 ratio with  $CD19^+$  B cells that were either in resting phase ( $DC_{Rest-B}$ ) or directly activated in DC-B cell co-culture via BCR stimuli ( $DC_{BCR-B}$ ).  $CD20$ -negative DCs from B cell-DC co-culture were analyzed for the intracellular expression of chemokines, CXCL8 and CCL4 by flow cytometry. Representative plot and mean  $\pm$  s.e.m of data from 4 donors. \* $P < 0.05$ ; \*\* $P < 0.01$ ; ns, not significant by one way analysis of variance test.

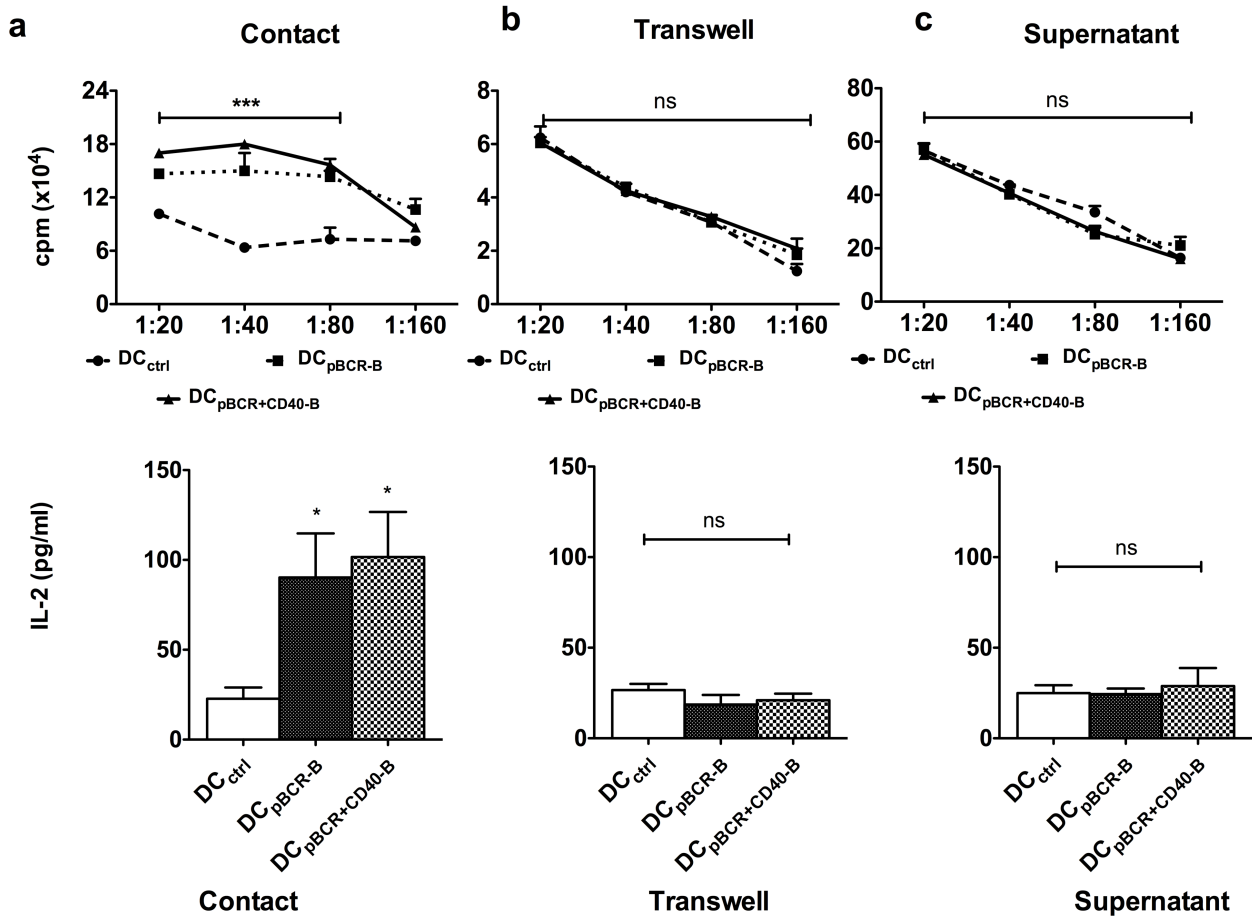

**Supplementary Figure 5. DCs gain ability to induce proliferation of CD4<sup>+</sup> cells and secretion of T cell cytokines only when they receive activation signals from B cells that are in direct contact with DCs. (a-c)** Immature DCs were cultured in medium containing GM-CSF and IL-4 for 48 hours either alone (DC<sub>ctrl</sub>) or with CD19<sup>+</sup> B cells pre-activated by BCR (DC<sub>pBCR-B</sub>) or BCR+CD40 (DC<sub>pBCR+CD40-B</sub>) stimulation. **(a)** Co-culture was done either in U-bottomed 96 well plates to allow direct contact between DCs and B cells (Contact) or **(b)** in trans-well plate to separate the B cells from DCs (Transwell). **(c)** In addition, immature DCs were cultured in the supernatants from activated B cells (Supernatant). DCs were purified from B cell-DC co-culture by depleting B cells. CD4<sup>+</sup> T cells were co-cultured with DCs at various ratios for 4 days. T cell proliferation (upper panels) was determined by [<sup>3</sup>H] incorporation assay and values are expressed as counts per minute (cpm). Values are mean±SEM of data from quadruplicate wells and representative of 3 independent experiments. Supernatants from DC-T cell co-cultures at 1:20 ratio were analyzed for IL-2 (lower panels). Mean ± s.e.m of data from 4 donors. \**P* < 0.05; \*\*\**P* < 0.001; ns, not significant by one way analysis of variance test.

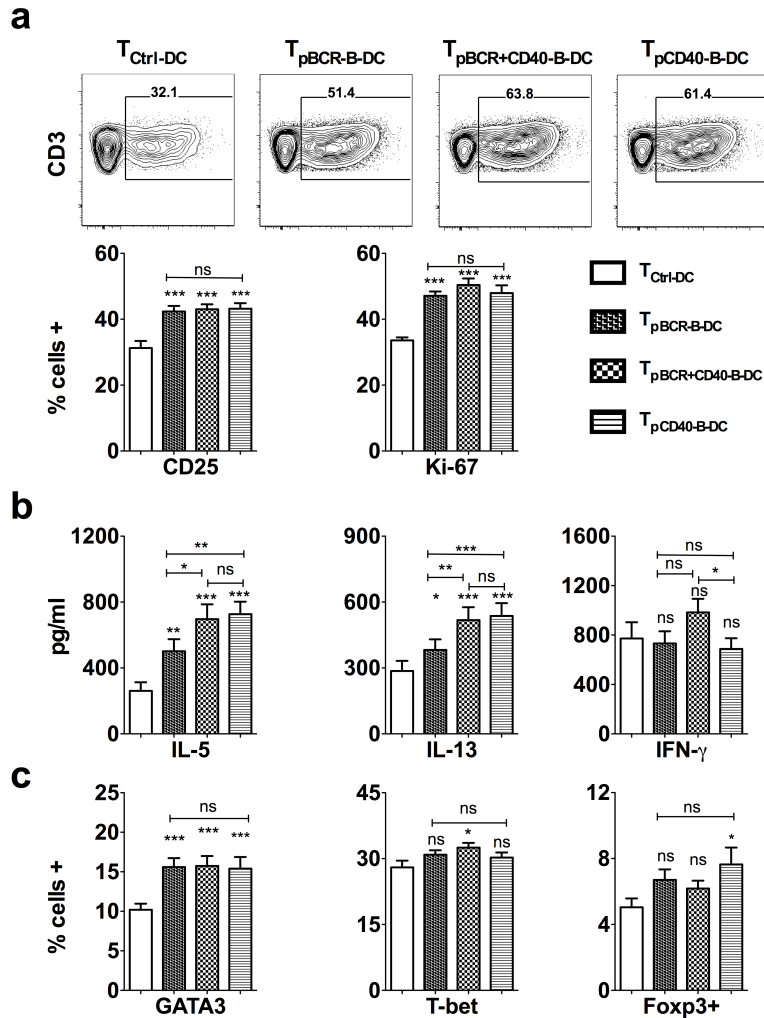

**Supplementary Figure 6. DCs activated by B cells stimulated with various stimuli favor polarization of naive CD4<sup>+</sup> T cells to Th2 cells.** Immature DCs were cultured in medium containing GM-CSF and IL-4 for 48 hours either alone ( $DC_{ctrl}$ ) or co-cultured at 1:1 ratio with CD19<sup>+</sup> B cells that were pre-activated by BCR ( $DC_{pBCR-B}$ ) or CD40 ( $DC_{pCD40-B}$ ) or BCR+CD40 ( $DC_{pBCR+CD40-B}$ ) stimulation. DCs were purified from B cell-DC co-culture by depleting B cells. CD4<sup>+</sup>CD45RO<sup>-</sup> naive Th cells were co-cultured with control DCs ( $T_{ctrl-DC}$ ) or B cell-matured DCs ( $T_{pBCR-B-DC}$  or  $T_{pBCR+CD40-B-DC}$  or  $T_{pCD40-B-DC}$ ) at the ratio of 20:1 for 6 days. **(a)** CD3<sup>+</sup> T cells were analyzed for the surface phenotype and intracellular expression of Ki-67 by flow cytometry. **(b)** After 6 days, supernatants from DC-T cell co-cultures were analyzed for T cell cytokines. **(c)** Flow cytometric analysis of transcription factors expressed by CD3<sup>+</sup> T cells co-cultured with DCs. Representative plot and mean  $\pm$  s.e.m of data from 6 donors. \* $P < 0.05$ ; \*\* $P < 0.01$ ; \*\*\* $P < 0.001$ ; ns, not significant by one way analysis of variance test.

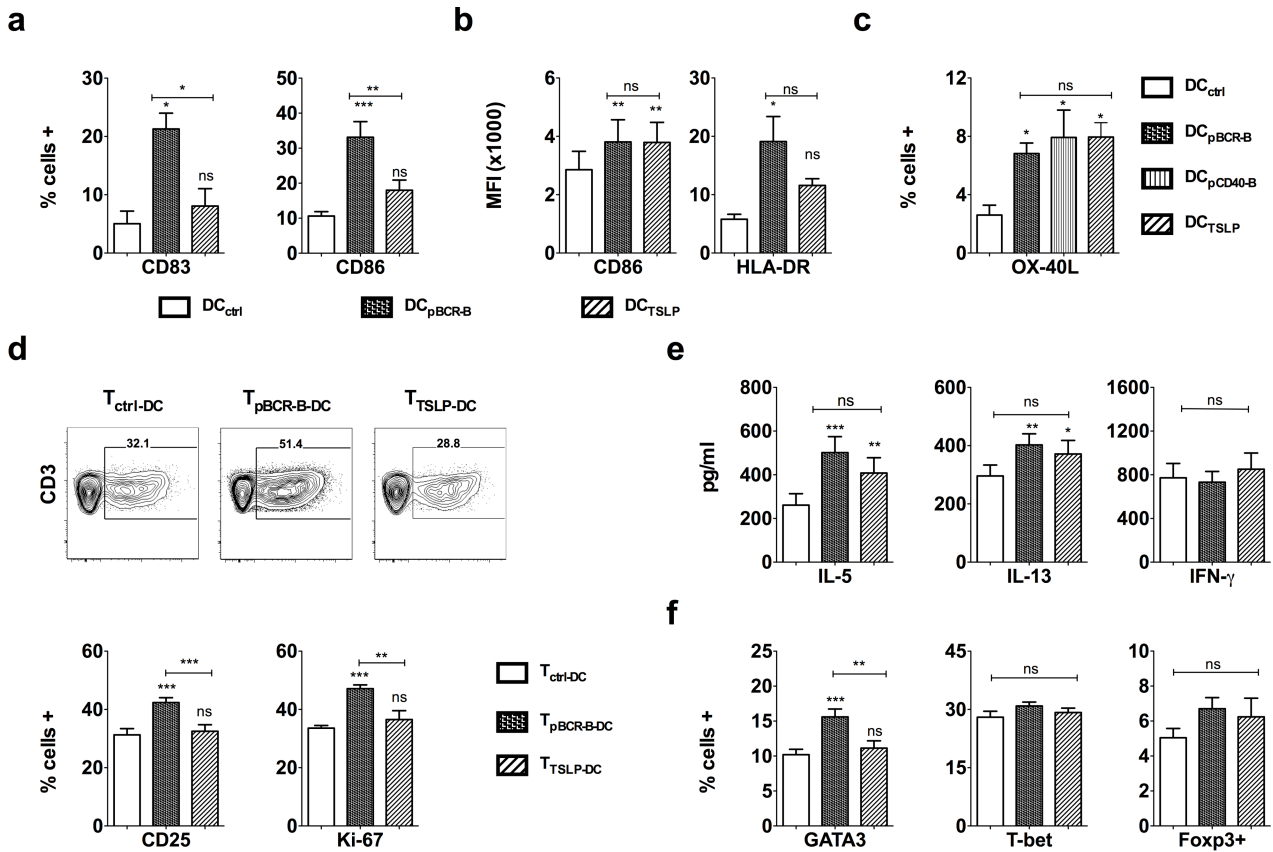

**Supplementary Figure 7. Comparison of DC phenotype and Th2 polarizing capacity of B cell-matured DCs versus TSLP-treated DCs.** Immature DCs were cultured in medium containing GM-CSF and IL-4 for 48 hours either alone ( $DC_{ctrl}$ ) or co-cultured at 1:1 ratio with  $CD19^+$  B cells that were pre-activated by BCR ( $DC_{pBCR-B}$ ) or CD40 ( $DC_{pCD40-B}$ ) or treated with TSLP (20 ng/ml) ( $DC_{TSLP}$ ). B cell-matured DCs were purified from the DC-B cell co-cultures by depleting B cells. **(a-c)** Expression of various markers (% positive cells and MFI) and of OX-40L (% positive cells) on DCs that were gated negative for CD20. **(d)**  $CD4^+CD45RO^-$  naive Th cells were co-cultured at the ratio of 20:1 for 6 days with control DCs ( $T_{ctrl-DC}$ ) or B cell-matured DCs ( $T_{pBCR-B-DC}$ ) or with TSLP-DC ( $T_{TSLP-DC}$ ).  $CD3^+$  T cells were analyzed for the surface phenotype and intracellular expression of Ki-67 and transcription factors by flow cytometry. **(e)** After 6 days, supernatants from DC-T cell co-cultures were analyzed for T cell cytokines. **(f)** Flow cytometric analysis of transcription factors expressed by  $CD3^+$  T cells co-cultured with DCs. Representative plot and mean  $\pm$  s.e.m of data from 4 donors. \* $P < 0.05$ ; \*\* $P < 0.01$ ; \*\*\* $P < 0.001$ ; ns, not significant by one way analysis of variance test.

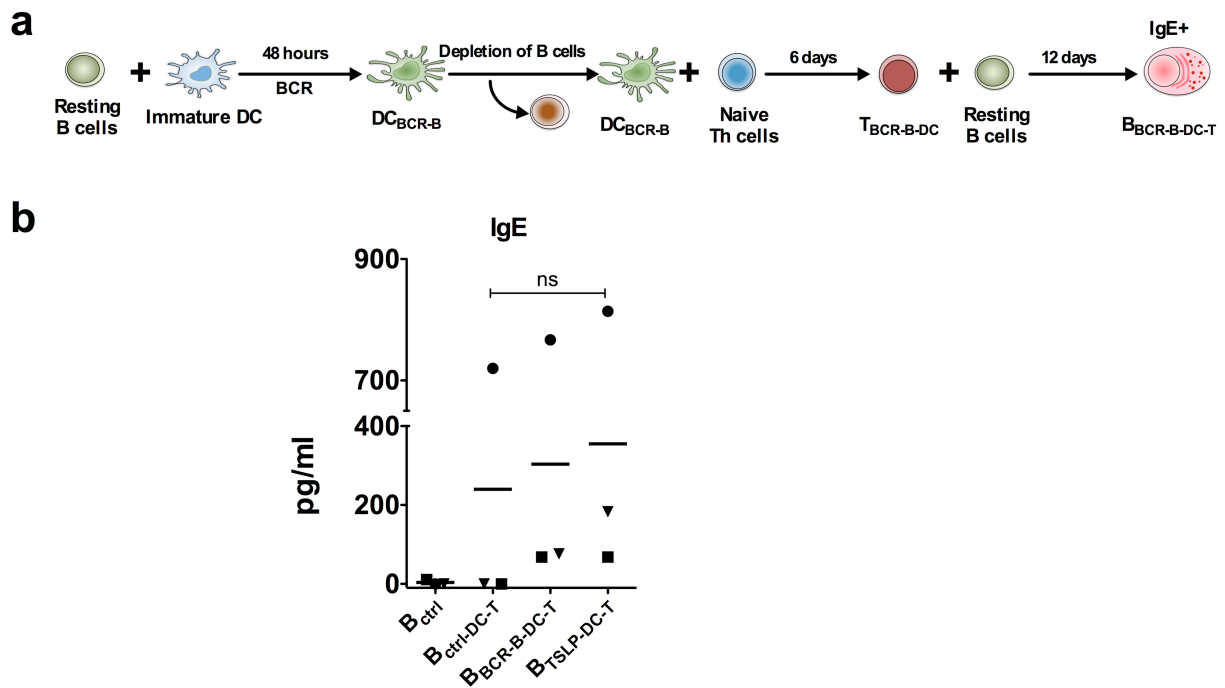

**Supplementary Figure 8. Th2-mediated IgE production in B cells induced by B cell-matured DC and TSLP-DC.** Immature DCs were cultured in medium containing GM-CSF and IL-4 for 48 hours either alone ( $DC_{ctrl}$ ) or co-cultured at 1:1 ratio with  $CD19^+$  B cells that were directly activated in DC-B cell co-culture via BCR stimuli ( $DC_{BCR-B}$ ) or treated with TSLP (20 ng/ml) ( $DC_{TSLP}$ ). **(a)** Experimental design for Th2-mediated IgE production in B cells. B cell-matured DCs were purified from the DC-B cell co-cultures by depleting B cells.  $CD4^+CD45RO^-$  naive Th cells were co-cultured at the ratio of 20:1 for 6 days with control DC ( $T_{ctrl-DC}$ ) or B cell-matured DC ( $T_{BCR-B-DC}$ ) or with TSLP-DC ( $T_{TSLP-DC}$ ).  $CD3^+$  T cells separated by DC-T cell co-culture were cultured with fresh  $CD19^+$  B cells at the ratio of 2.5:1 for 12 days. **(b)** Supernatants from B cells that were cultured alone ( $B_{ctrl}$ ) or co-cultured with T cells that were differentiated by control DC ( $B_{ctrl-DC-T}$ ) or B cell-matured DC ( $B_{BCR-B-DC-T}$ ) or TSLP-treated DC ( $B_{TSLP-DC-T}$ ) were analyzed for the amounts of secreted IgE by ELISA. Mean values are presented by horizontal lines. Data are from 3 donors. ns, not significant by one way analysis of variance test.



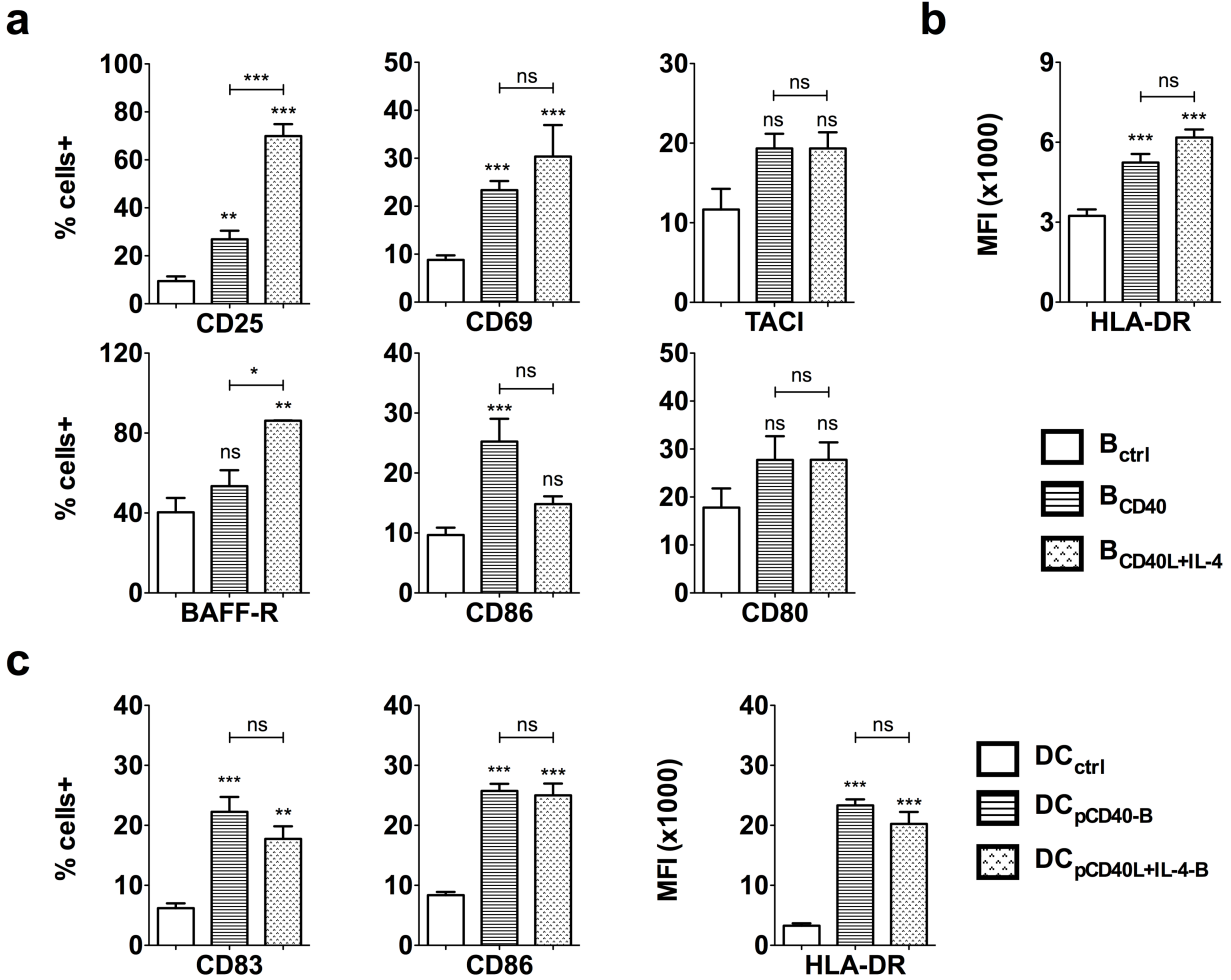

**Supplementary Figure 9. Comparison of B cell stimulation by CD40 and CD40L+IL-4 and subsequent DC maturation. (a, b)** CD19<sup>+</sup> B cells were either cultured alone (B<sub>ctrl</sub>) or in the presence of agonistic CD40 antibody (B<sub>CD40</sub>) alone or CD40L+IL-4 (B<sub>CD40L+IL-4</sub>) for 2 days. Expression of surface activation markers was analyzed by flow cytometry. Mean ± s.e.m of data from 5 donors. **(c)** Immature DCs were cultured in medium containing GM-CSF and IL-4 for 48 hours either alone (DC<sub>ctrl</sub>) or co-cultured with CD19<sup>+</sup> B cells that were pre-activated by agonistic CD40 antibody (DC<sub>pCD40-B</sub>) or CD40L+IL-4 (DC<sub>pCD40L+IL-4-B</sub>) stimulation. Expression of surface activation markers on DCs was analyzed by flow cytometry. Mean ± s.e.m of data from 4 donors. \**P* < 0.05; \*\**P* < 0.01; \*\*\**P* < 0.001; ns, not significant by one way analysis of variance test.
